# Supplementary material
Source: MDPI journal article supplement (https://www.mdpi.com/2073-4395/10/2/206)

Supplementary Figure 1. Frequency distribution of the germination potentials (percentage) of the wheat accessions evaluated

Supplementary Figure 2. The frequency histograms of measured root traits


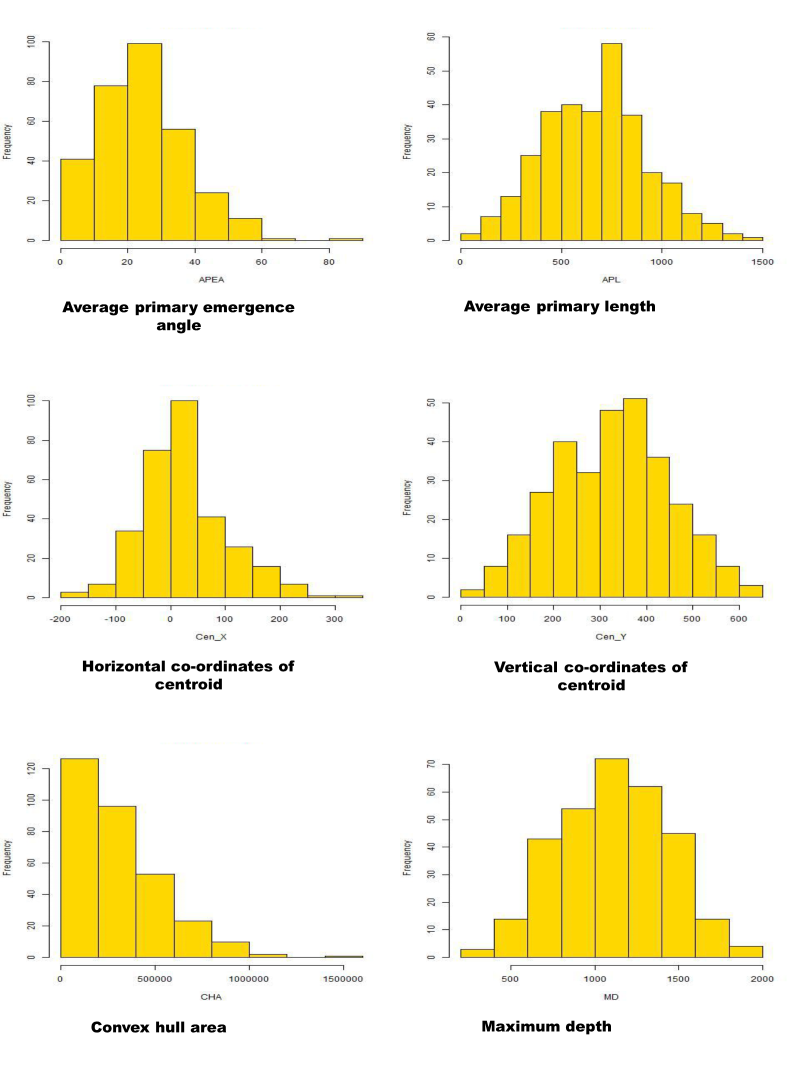


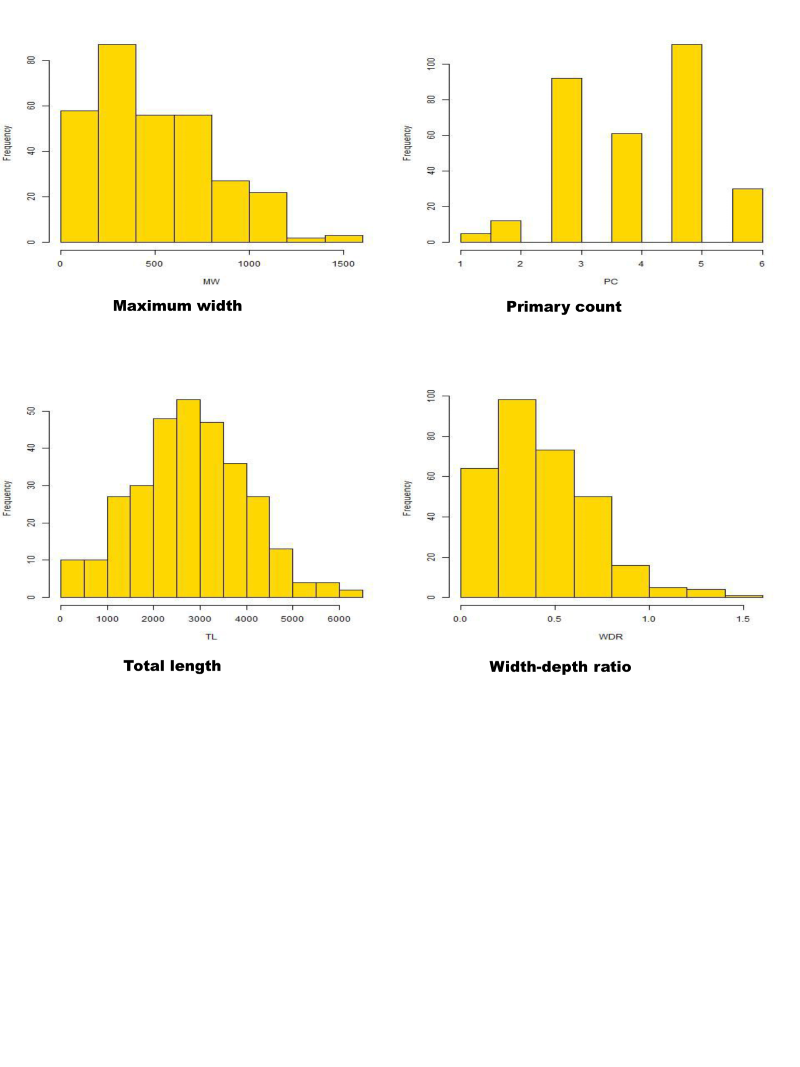

Supplement: s1 [file s1]
